# Supplementary material for: Chemical Shift-Encoded MRI of Bone Metabolic Markers in Ankylosing Spondylitis
Source: Dis Markers. 2022 Oct 13;2022:1846667. doi: 10.1155/2022/1846667 (PMC9584712; doi:10.1155/2022/1846667)
Supplement: Supplementary Materials — Table S1: overview of FF, R2∗ values and clinical data of 4 groups. Table S2–S5: FF and R2∗ value of each ROI in different 4 groups. [file 1846667.f1.zip › Table S1.pdf]

Data for bone metabolic study in the patients with AS

| Name | Age | Sex | Group | SCB FF | SCB R2* | BME FF | BME R2* | FM FF | FM R2* | CRP  | HLA-B27  | ESW | Date            |
|------|-----|-----|-------|--------|---------|--------|---------|-------|--------|------|----------|-----|-----------------|
| 宁盼盼  | 30  | F   | EA    | 56.05  | 173.71  | 25.86  | 122.44  | 88.76 | 150.05 | 16.7 | 630      |     | 2021/4/29 14:17 |
| 廖秋妹  | 34  | F   | EA    | 53.54  | 163.05  | 0      |         | 82.17 | 163.52 | 1.28 | 672      | 11  | 2021/6/3 16:24  |
| 夏水兰  | 44  | F   | EA    | 17.55  | 98.74   | 11.73  | 192.09  | 0     |        | 6.97 | 712      | 12  | 2021/6/2 17:38  |
| 杨小莉  | 30  | F   | EA    | 63.32  | 121.21  |        |         | 84.16 | 97.15  | 20   | 630      |     | 2021/6/1 16:26  |
| 陈韵怡  | 30  | F   | EA    | 70.84  | 168.93  | 44.48  | 165.75  | 88.64 | 148.95 | 13.4 | 62       |     | 2021/6/1 10:19  |
| 吴旭基  | 27  | M   | EA    | 58.29  | 148.23  | 46.69  | 112.57  | 88.5  | 95.87  | 4.66 | 630      | 8   | 2021/7/17 9:04  |
| 陈庆鸿  | 50  | M   | EA    | 84.76  | 151.05  | 50.15  | 165.32  | 94.02 | 123.68 | 10.4 | 919      | 69  | 2021/7/16 7:27  |
| 刘新火  | 22  | M   | EA    | 54.01  | 185.56  | 9.41   | 179.15  | 91.45 | 98.55  | 67.7 | 716      | 107 | 2021/7/13 9:33  |
| 宋艺敏  | 25  | F   | EA    | 48.42  | 137.85  | 27.31  | 119.11  | 90.35 | 142.83 | 20.3 | 630      |     | 2021/7/10 10:01 |
| 钟杰   | 28  | M   | EA    |        |         |        |         |       |        | 13.1 | 630      |     | 2021/7/7 9:42   |
| 彭欲娴  | 33  | F   | EA    | 53.13  | 163.96  | 3.67   | 135.64  |       |        | 18.1 | 630      |     | 2021/8/12 0:00  |
| 谭珊珊  | 33  | F   | EA    | 58.26  | 115.95  | 45.89  | 146.89  |       |        | 12.7 | 58       |     | 2021/8/11 0:00  |
| 王慧敏  | 29  | F   | EA    | 57.12  | 190.08  | 24.43  | 150.67  |       |        | 21.6 | 48.3     | 2   | 2021/9/3        |
| 祖靖   | 44  | M   | EA    | 61.11  | 139.02  |        |         |       |        | 11.7 | 151      | 2   | 2021/9/1        |
| 卢健   | 31  | F   | EA    |        |         |        |         |       |        | 13   | 50.7     |     | 2021/10/2 8:11  |
| 宋梓闻  | 11  | M   | EA    | 44.37  | 179.05  | 38.76  | 172.14  |       |        | 18.5 | 689      | 63  |                 |
| 沈睦   | 41  | M   | EA    | 70.62  | 132.77  | 46.19  | 161.39  | 87.95 | 63.57  | 20.7 | 663      |     | 2021/7/13 9:03  |
| 谢远仙  | 26  | F   | EA    | 72.76  | 130.58  | 0      |         | 0     |        | 12.6 | 630      |     |                 |
| 阮美君  | 24  | F   | EA    | 48.98  | 146.32  | 7.5    | 96.8    | 71.08 | 171.37 | 19.7 | 630      |     | 2021/10/26 9:10 |
| 黄雨湘  | 32  | M   | EA    | 53.62  | 151.94  | 20.5   | 106.36  | 71.14 | 77     | 8.16 | 685      | 32  | 2021/1/27 14:59 |
| 王佳   | 31  | M   | EA    | 56.98  | 153.14  | 27.67  | 169     |       |        | 16.7 | 47.5     | 13  | 2021/2/1 9:29   |
| 冯桂萌  | 26  | F   | EA    | 61.54  | 138.07  | 22.91  | 124.47  |       |        | 26.2 | 43.6     |     | 2021/3/3 10:12  |
| 郭冬琪  | 26  | F   | EA    | 42.98  | 133.81  | 13.48  | 89.95   |       |        | 6.43 | 978      | 16  | 2021/3/26 11:05 |
| 刘维平  | 36  | F   | EA    | 38.72  | 149.99  | 8.15   | 137.98  |       |        | 7.19 | 81.3     |     | 2021/3/26 14:52 |
| 吴国龙  | 28  | M   | LA    | 58.44  | 161.06  | 13.15  | 105.65  |       |        | 2.79 | negative | 10  | 2021/2/1 11:05  |
| 申三玉  | 28  | M   | LA    | 54.17  | 159.37  | 35.19  | 113.53  | 94.6  | 120.48 | 2.43 | 803      | 24  | 2021/4/25 14:53 |
| 程思   | 21  | M   | LA    | 82.88  | 151.77  | 43.03  | 179.84  | 93.14 | 127.01 | 13.9 | 566      | 68  | 2021/4/6 13:00  |
| 蔡钦童  | 32  | M   | LA    | 61.46  | 191.79  | 5.45   | 166.17  | 84.57 | 110.47 | 11.5 | 679      | 59  | 2021/5/26 15:37 |
| 罗可美  | 27  | F   | LA    | 53.21  | 176.16  |        |         | 92.03 | 114.22 | 2.58 | 112      | 40  | 2021/5/14 15:48 |
| 洪美凤  | 31  | F   | LA    | 44.99  | 164.96  | 26.1   | 169.45  |       |        | 0    |          | 18  | 2021/5/10 14:12 |
| 肖亮   | 30  | M   | LA    | 77.04  | 138.13  |        |         | 78.45 | 101.82 | 2.84 |          | 67  | 2021/6/25 17:54 |
| 叶和兴  | 32  | M   | LA    | 77.86  | 115.29  | 27.54  | 120.86  | 92.58 | 93.15  | 6.2  | 587      | 54  | 2021/6/21 14:33 |
| 何联   | 38  | M   | LA    | 65.26  | 155.43  | 47.12  | 111.32  | 85.94 | 133.89 | 15.9 | 709      | 57  | 2021/6/5 12:24  |

|     |    |   |    |       |        |       |        |       |        |      |          |    |                  |
|-----|----|---|----|-------|--------|-------|--------|-------|--------|------|----------|----|------------------|
| 凌春强 | 27 | M | LA | 69.24 | 165.02 |       |        |       |        | 10.3 | 41.8     |    | 2021/7/30 8:41   |
| 余琼花 | 52 | F | LA | 68.98 | 136.03 | 55.7  | 136.06 | 79.56 | 160.24 | 5.16 | 816      | 59 | 2021/7/28 14:39  |
| 曾雪涓 | 31 | F | LA | 55.85 | 157.99 | 27.93 | 136.89 |       |        | 10.3 |          |    | 2021-08-31       |
| 罗惠  | 21 | F | LA | 75.39 | 122.36 | 46.02 | 116.04 | 91.84 | 97.5   | 8.86 |          | 47 | 2021/8/19 0:00   |
| 林鹏彬 | 37 | M | LA | 69.93 | 120.05 | 34.74 | 88.59  | 85.44 | 114.28 | 3.58 | 867      | 30 | 2021/8/13 0:00   |
| 刘杰  | 17 | M | LA | 38    | 115.2  | 7.59  | 74.15  | 66.99 | 139.16 | 11.2 | 842      | 39 | 2021/8/10 0:00   |
| 文志鹏 | 29 | M | LA | 107.9 | 156.59 | 66.29 | 151.73 | 75.17 | 200.94 | 0.98 | 834      | 28 | 2021/9/30        |
| 李秋  | 25 | F | LA | 41.37 | 143.02 | 26.89 | 108.82 | 63.99 | 160.83 | 10.4 |          | 26 | 2021/9/28        |
| 黄以满 | 27 | M | LA | 73.01 | 114.47 | 25.01 | 99.87  | 91.4  | 128.69 | 9.99 |          | 5  | 2021/9/6         |
| 黄昌珍 | 25 | F | LA | 45.18 | 152.74 | 51.91 | 143.24 | 82.62 | 171.62 | 14.1 | 52       | 2  | 2021/9/15        |
| 王冲  | 26 | M | LA | 76.6  | 110.61 |       |        | 94.96 | 116.66 | 13.9 | 760      | 90 | 2021/10/18 10:21 |
| 冯小康 | 28 | M | LA | 64.69 | 135.64 |       |        | 83.82 | 129.83 | 5.48 | 817      | 25 | 2021/10/16 17:00 |
| 孔德钦 | 39 | M | LA | 59.86 | 182.99 |       |        | 87.4  | 150.1  | 6.67 | 53.9     | 34 | 2021/10/11 11:39 |
| 谢远仙 | 26 | F | LA | 51.47 | 201.65 | 30.92 | 203.64 | 72.88 | 195.37 | 6.69 |          |    |                  |
| 肖晓文 | 27 | F | LA | 72.76 | 125.75 |       |        | 89.04 | 112.88 | 10.3 | 835      | 35 | 2021/10/22 17:02 |
| 冯威润 | 22 | M | IA | 53.37 | 240.36 |       |        | 0     |        | 43   |          |    | 2021/1/25 14:38  |
| 周依柔 | 22 | F | IA | 55.33 | 137.35 |       |        | 89.58 | 150.68 | 0    |          | 16 | 2021/1/28 11:04  |
| 方烨炜 | 28 | M | IA | 68.86 | 130.02 |       |        | 0     |        | 0    | 118      | 9  | 2021/3/3 11:04   |
| 胡思达 | 27 | M | IA | 65.11 | 152.58 |       |        | 89.87 | 104.15 | 0    |          |    | 2021/3/15 8:19   |
| 万丽红 | 40 | F | IA | 57.58 | 168.41 |       |        | 64.01 | 162.29 | 0    | 721      | 16 | 2021/3/16 10:22  |
| 罗发成 | 50 | M | IA | 64.1  | 154.81 |       |        | 87.9  | 140.29 | 0    | 64       | 2  | 2021/3/31 15:18  |
| 康少明 | 24 | M | IA | 58.02 | 143.6  |       |        |       |        | 0    | 122      | 8  | 2021/4/30 15:40  |
| 何细华 | 33 | F | IA | 58.41 | 161.31 |       |        |       |        | 2.56 | 598      | 26 | 2021/4/25 16:00  |
| 李明裕 | 29 | M | IA | 59.53 | 180.31 |       |        |       |        | 0    |          |    | 2021/4/23 22:01  |
| 顾娟娟 | 34 | F | IA | 75.1  | 125.97 |       |        |       |        | 0    | 89.7     | 2  | 2021/4/16 16:56  |
| 何向兰 | 29 | F | IA | 57.73 | 149.46 |       |        | 85.24 | 113.65 | 0    | 750      | 2  | 2021/5/26 16:17  |
| 胡南祥 | 41 | M | IA | 76.74 | 128.73 |       |        | 94.48 | 105.97 | 0    | 59.5     |    | 2021/5/14 8:53   |
| 舒玲  | 41 | F | IA | 57.13 | 125.46 |       |        |       |        | 0    | 206      | 4  | 2021/6/21 10:34  |
| 陈祖芬 | 33 | F | IA | 56.49 | 165.5  | 32.24 | 132.89 |       |        | 0    |          |    | 2021/6/11 10:52  |
| 史庆华 | 43 | M | IA | 59.44 | 153.32 |       |        |       |        | 0    | 45.4     |    | 2021/6/9 10:13   |
| 曾雪云 | 27 | F | IA | 60.13 | 110.95 | 52.05 | 121.98 | 82.1  | 103.72 | 0    | positive |    | 2021/6/3 15:53   |
| 陈怡锋 | 31 | M | IA | 45.39 | 172.66 | 33.14 | 137.26 | 71.37 | 150.37 | 0    | 806      | 16 | 2021/7/27 14:32  |
| 李柔霞 | 29 | F | IA | 57.64 | 102.36 | 62.29 | 103.67 | 73.29 | 94.16  | 0    |          | 2  | 2021/7/19 14:25  |
| 王思涵 | 15 | F | IA | 60.41 | 123.1  | 62.43 | 120.9  | 75.97 | 115.77 | 0    |          | 18 | 2021/7/15 12:07  |
| 薛智萍 | 33 | F | IA | 47.12 | 150.28 | 32.67 | 138.58 | 79.11 | 112.24 | 0    |          | 7  | 2021/7/12 20:02  |

|      |    |   |    |       |        |       |        |       |        |   |         |                 |
|------|----|---|----|-------|--------|-------|--------|-------|--------|---|---------|-----------------|
| 蔡山山  | 28 | M | IA | 52.75 | 170.15 | 40.95 | 150.2  | 73.19 | 160.45 | 0 | 6       | 2021/8/24 0:00  |
| 施丽茜子 | 33 | F | IA | 60.53 | 129.74 |       |        | 87.25 | 131.5  | 0 | 41.8 3  | 2021/9/29       |
| 刘海月  | 43 | M | IA | 44.84 | 150.02 | 15.23 | 160.31 |       |        | 0 |         |                 |
| 常运粮  | 36 | F | IA | 40.64 | 124.84 |       |        |       |        | 0 | 41 2    | 2021/9/21       |
| 巫丽侠  | 40 | M | IA | 44.8  | 277.23 | 29.05 | 228.31 |       |        | 0 |         | 2021/9/18       |
| 陶小文  | 31 | F | IA | 46.17 | 147.81 | 36.2  | 139.59 |       |        | 0 |         | 2021/9/8        |
| 杨洁   | 48 | M | IA | 74.75 | 138.67 |       |        | 89.62 | 133.18 | 0 | 44.2 19 | 2021/10/18 8:18 |
| 李文娟  | 33 | F | NC | 55.78 | 116.1  |       |        |       |        |   |         | 2021/4/29 14:47 |
| 陈少辉  | 30 | F | NC | 66.03 | 129.16 |       |        |       |        |   |         | 2021/4/25 11:46 |
| 张德意  | 25 | F | NC | 58.86 | 192.38 |       |        |       |        |   |         | 2021/4/9 14:32  |
| 陶珊   | 27 | F | NC | 67.81 | 158.41 |       |        |       |        |   |         | 2021/4/8 14:51  |
| 公建伟  | 26 | F | NC | 43.22 | 155.32 |       |        |       |        |   |         | 2021/7/19 11:31 |
| 何书恒  | 24 | F | NC | 64.15 | 147.73 |       |        |       |        |   |         | 2021/9/25       |
| 许文芳  | 30 | F | NC | 46.35 | 137.83 |       |        |       |        |   |         | 2021/10/1 9:52  |
| 刘正龙  | 28 | F | NC | 47.12 | 205.24 |       |        |       |        |   |         | 7月10日           |
| 李明明  | 25 | F | NC | 54.17 | 133.31 |       |        |       |        |   |         | 7月10日           |
| 吴高云  | 27 | F | NC | 54.06 | 147.23 |       |        |       |        |   |         | 7月10日           |
| 石鹏   | 27 | F | NC | 64.86 | 119.8  |       |        |       |        |   |         | 7月10日           |
| 邬亮晓  | 29 | F | NC | 72.02 | 131.68 |       |        |       |        |   |         | 7月10日           |
| 李根   | 32 | F | NC | 55.84 | 139.44 |       |        |       |        |   |         | 7月11日           |
| NN   | 32 | F | NC | 64.04 | 148.4  |       |        |       |        |   |         | 7月11日           |
| 程彬   | 34 | F | NC | 58.99 | 130.96 |       |        |       |        |   |         | 2021/7/18       |
| 林嗣弦  | 28 | F | NC | 54.9  | 180.8  |       |        |       |        |   |         | 2021/7/18       |
| LL   | 26 | M | NC | 54.48 | 129.3  |       |        |       |        |   |         | 2021/7/18       |
| 贺守第  | 34 | M | NC | 67.64 | 125.87 |       |        |       |        |   |         | 2021/7/24       |
| 严佳倩  | 27 | M | NC | 68.94 | 136.92 |       |        |       |        |   |         | 2021/7/24       |
| 陈飞宇  | 27 | M | NC | 53.72 | 122.4  |       |        |       |        |   |         | 2021/7/24       |
| QQ   | 28 | M | NC | 62.49 | 113.35 |       |        |       |        |   |         | 7月24日           |
| 徐明   | 26 | M | NC | 69.24 | 128.6  |       |        |       |        |   |         | 2021/8/7        |
| 李惠群  | 32 | M | NC | 43.17 | 163.24 |       |        |       |        |   |         | 2021/8/7        |
| 杨洁   | 31 | M | NC | 45.29 | 138.45 |       |        |       |        |   |         | 2021/8/7        |
| 卫杨雄  | 23 | M | NC | 48.39 | 229.79 |       |        |       |        |   |         | 2021/8/7        |
| 徐国生  | 30 | M | NC | 68.44 | 156.82 |       |        |       |        |   |         | 2021/8/7        |
| 宋房珠  | 28 | M | NC | 58.25 | 150.39 |       |        |       |        |   |         | 2021/8/7        |
| 刘孟茧  | 24 | M | NC | 70.31 | 125.33 |       |        |       |        |   |         | 2022/7/16       |

|     |    |   |    |       |        |  |  |  |            |
|-----|----|---|----|-------|--------|--|--|--|------------|
| 刘湘艳 | 27 | M | NC | 61.84 | 139.22 |  |  |  | 2022/7/16  |
| 王瑞敏 | 36 | M | NC | 56.11 | 118.12 |  |  |  | 2022年7月23日 |
| 魏新  | 31 | M | NC | 71.66 | 124.27 |  |  |  | 2022年7月23日 |
| 梁强  | 31 | M | NC | 60.14 | 144.61 |  |  |  | 2022年7月23日 |
| 姚望  | 37 | M | NC | 53.89 | 181.18 |  |  |  | 2022年7月23日 |
| 王姣  | 32 | M | NC | 49.13 | 113.51 |  |  |  | 2022年7月24日 |
| 冯书仑 | 41 | F | NC | 73.93 | 151.21 |  |  |  | 2022年7月24日 |
| 何兴鸿 | 42 | F | NC | 67.51 | 148.67 |  |  |  | 2022年7月24日 |
| 祝继锋 | 38 | F | NC | 63.99 | 147.69 |  |  |  | 2022年7月24日 |
| 曾闻君 | 42 | F | NC | 44.84 | 158.84 |  |  |  | 2022年7月24日 |
| 马萍  | 42 | F | NC | 75.38 | 111.61 |  |  |  | 2022年7月24日 |
| 肖平平 | 48 | F | NC | 47.48 | 191.78 |  |  |  | 2022年7月24日 |
| 李温青 | 39 | F | NC | 63.75 | 150.2  |  |  |  | 2022年7月24日 |
| 林耀山 | 42 | F | NC | 63.86 | 154.44 |  |  |  | 2022年7月30日 |
| 陈清秀 | 40 | F | NC | 53.58 | 165.51 |  |  |  | 2022年7月30日 |
| 唐伟  | 38 | F | NC | 55.96 | 151.16 |  |  |  | 2022年7月30日 |
| 张德胜 | 48 | F | NC | 55.91 | 176.63 |  |  |  | 2022年7月30日 |
| 马彪  | 41 | M | NC | 69.92 | 134.32 |  |  |  | 2022年7月30日 |
| 许欣欣 | 40 | M | NC | 51.85 | 130.93 |  |  |  | 2022年7月31日 |
| 雷婕  | 42 | M | NC | 46.03 | 113.93 |  |  |  | 2022年7月31日 |
| 何宝华 | 44 | M | NC | 43.18 | 152.96 |  |  |  | 2022年7月31日 |
| 吕宝艳 | 47 | M | NC | 60.7  | 141.6  |  |  |  | 2022年7月31日 |
| 徐伟  | 43 | M | NC | 71.37 | 151.42 |  |  |  | 2022年7月31日 |
| 林树俊 | 42 | M | NC | 64.11 | 155.44 |  |  |  | 2022/8/6   |
| 梁立庚 | 42 | M | NC | 77.36 | 144.39 |  |  |  | 2022/8/6   |
| 陈庚  | 45 | M | NC | 61.38 | 150.95 |  |  |  | 2022/8/6   |

AS, ankylosing spondylitis;  
CRP, C-reactive protein; ESR, erythrocyte sedimentation rate ;FF, fat fraction;  
SCB, Subchondral bone, BME, bone marrow edema, FM, fat metaplasia.
