# Supplementary material for: Chemical Shift-Encoded MRI of Bone Metabolic Markers in Ankylosing Spondylitis
Source: Dis Markers. 2022 Oct 13;2022:1846667. doi: 10.1155/2022/1846667 (PMC9584712; doi:10.1155/2022/1846667)
Supplement: Supplementary Materials — Table S1: overview of FF, R2∗ values and clinical data of 4 groups. Table S2–S5: FF and R2∗ value of each ROI in different 4 groups. [file 1846667.f1.zip › Table S2.pdf]

### FF&R2value in Early Active Group from October 2020 to November 2021

[illegible]

|          |        |        |        |       |      |      |        |        |       |       |       |        |        |        |
|----------|--------|--------|--------|-------|------|------|--------|--------|-------|-------|-------|--------|--------|--------|
| 宋梓闻      | FF (%) | 57.69  | 54.55  | 59.83 | 45.4 | 64.2 | 26.67  | 51.04  | 25.78 | 42.47 | 26.83 | 33.33  | 44.63  | 20.59  |
|          | R2*    | 132.97 | 163.24 | 175   | 189  | 134  | 139.27 | 216.15 | 151.3 | 186   | 187.3 | 186.07 | 288.67 | 177.7  |
| 沈睦       | FF (%) | 57.9   | 83.03  | 63.07 | 67.5 | 73.8 | 72.13  | 73.3   | 92.5  | 66.93 | 56.19 | 70.91  | 70.28  | 48.97  |
|          | R2*    | 162.39 | 133.09 | 131.8 | 117  | 115  | 121.2  | 149.9  | 63.57 | 154.2 | 163.9 | 162.22 | 119.12 | 191.67 |
| 刘正龙      | FF (%) | 66.18  | 79.32  | 74.33 | 64.4 | 66.2 | 79.32  | 74.33  | 86.15 | 73.8  | 73.2  | 73.27  | 62.64  | 49.06  |
|          | R2*    | 116.82 | 119.62 | 140.8 | 140  | 117  | 119.62 | 140.82 | 100.2 | 109.4 | 145.8 | 147.1  | 170.03 | 160.82 |
| 阮美君      | FF (%) | 50.79  | 50.04  | 52.08 | 63.8 | 52   | 46.29  | 43     | 55.42 | 71.54 | 42.29 | 5.29   | 55.18  | 45.67  |
|          | R2*    | 178.67 | 175.54 | 149.7 | 129  | 136  | 137.62 | 171.23 | 163.1 | 141.2 | 139.1 | 90.42  | 144.91 | 111    |
| 黄雨湘      | FF (%) | 42.88  | 43.47  | 150.7 | 54.3 | 32.8 | 46.43  | 48.57  | 57.47 | 28.33 | 28.57 | 56.87  | 53.06  | 39.13  |
|          | R2*    | 129.97 | 155.33 | 175.8 | 157  | 108  | 182.9  | 199.4  | 132.4 | 164.5 | 114.1 | 158.47 | 145.76 | 175.79 |
| 王佳       | FF (%) | 57.79  | 62.55  | 55.68 | 67.7 | 52.6 | 54.52  | 45.73  | 56.72 | 59.52 | 60.87 | 52.64  | 57.54  | 59.88  |
|          | R2*    | 148.42 | 127.86 | 158.4 | 97.6 | 154  | 135.92 | 253.82 | 146.2 | 152.7 | 147.7 | 164.45 | 150.79 | 127.58 |
| 冯桂萌      | FF (%) | 55.77  | 62.17  | 60.45 | 63.1 | 59.8 | 60.82  | 53.79  | 63.18 | 78.09 | 57.35 | 61.52  | 62.43  | 61.36  |
|          | R2*    | 146.27 | 137.91 | 139.6 | 127  | 150  | 130.59 | 154.04 | 118.3 | 133.6 | 137.8 | 155.13 | 126.35 | 111.27 |
| 早期急性:郭冬琪 | FF (%) | 51.16  | 50.05  | 41.58 | 46.9 | 56.7 | 38.76  | 33.41  | 50.72 | 52.22 | 33.47 | 20.16  | 40.72  | 35.93  |
|          | R2*    | 125.32 | 128.79 | 134.2 | 135  | 142  | 157.84 | 163.06 | 104   | 128.1 | 158.2 | 108.68 | 121.39 | 136.7  |
| 早期急性:刘维平 | FF (%) | 39.21  | 37.37  | 39.53 | 46.5 | 49.5 | 42.35  | 45.06  | 26.87 | 42.22 | 30.47 | 32.06  | 33.53  | 33.44  |
|          | R2*    | 177.94 | 127.95 | 153.5 | 142  | 154  | 161.41 | 172.72 | 93.42 | 143.1 | 150.4 | 188.28 | 135.95 | 153.33 |

### FF&R2value in Early Active Group from October 2020 to November 2021

[illegible]

|     |        |        |        |        |        |        |          |        |        |        |
|-----|--------|--------|--------|--------|--------|--------|----------|--------|--------|--------|
| 宋梓闻 | FF (%) | 35.83  | 36.38  | 44.08  |        |        | 38.76333 |        |        |        |
|     | R2*    | 170.5  | 182.62 | 163.3  |        |        | 172.14   |        |        |        |
| 沈睦  | FF (%) | 40.9   | 51.47  |        |        |        | 46.185   | 92.5   | 83.4   | 87.95  |
|     | R2*    | 144.4  | 178.38 |        |        |        | 161.39   | 63.57  | 63.57  | 63.57  |
| 刘正龙 | FF (%) |        |        |        |        |        |          |        |        |        |
|     | R2*    |        |        |        |        |        |          |        |        |        |
| 阮美君 | FF (%) | 8.83   | 6.17   |        |        |        | 7.5      | 70.58  | 71.58  | 71.08  |
|     | R2*    | 94.17  | 99.42  |        |        |        | 96.795   | 157.12 | 185.62 | 171.37 |
| 黄雨湘 | FF (%) | 15.52  | 22.57  | 28     | 27.24  | 20.5   | 22.766   | 71.14  |        | 71.14  |
|     | R2*    | 158.57 | 229.9  | 112.73 | 119.52 | 106.36 | 145.416  | 77     |        | 77     |
| 王佳  | FF (%) | 40.5   | 14.84  |        |        |        | 27.67    |        |        |        |
|     | R2*    | 143.5  | 194.5  |        |        |        | 169      |        |        |        |
| 冯桂萌 | FF (%) | 13.96  | 18.22  | 36.55  |        |        | 22.91    |        |        |        |
|     | R2*    | 83.84  | 157.83 | 131.73 |        |        | 124.4667 |        |        |        |
| 郭冬琪 | FF (%) | 9.74   | 17.21  |        |        |        | 13.475   |        |        |        |
|     | R2*    | 84     | 95.89  |        |        |        | 89.945   |        |        |        |
| 刘维平 | FF (%) | 12.72  | 7.72   | 4      |        |        | 8.146667 |        |        |        |
|     | R2*    | 124.83 | 103.5  | 185.61 |        |        | 137.98   |        |        |        |
