# Supplementary material for: Chemical Shift-Encoded MRI of Bone Metabolic Markers in Ankylosing Spondylitis
Source: Dis Markers. 2022 Oct 13;2022:1846667. doi: 10.1155/2022/1846667 (PMC9584712; doi:10.1155/2022/1846667)
Supplement: Supplementary Materials — Table S1: overview of FF, R2∗ values and clinical data of 4 groups. Table S2–S5: FF and R2∗ value of each ROI in different 4 groups. [file 1846667.f1.zip › Table S3.pdf]

## FF&R2\* value in Late Active Group from October 2020 to November 2021

| name | parameter | Different Regions Of SIJ_ROI |        |        |        |        |        |       |       |        |        | S2 Vertebral Body_ROI |        |        |
|------|-----------|------------------------------|--------|--------|--------|--------|--------|-------|-------|--------|--------|-----------------------|--------|--------|
|      |           | 1                            | 2      | 3      | 4      | 5      | 6      | 7     | 8     | 9      | 10     | 11                    | 12     | 13     |
| 吴国龙  | FF (%)    | 53.56                        | 58.17  | 56.59  | 64.28  | 65.39  | 66.62  | 61.75 | 69.79 | 57.92  | 54.44  | 40.96                 | 51.84  | 50.52  |
|      | R2*       | 186.92                       | 195.92 | 139.77 | 132.44 | 122.04 | 150.88 | 170.8 | 90.62 | 160.5  | 206.44 | 163.08                | 213.36 | 161.26 |
| 申三玉  | FF (%)    | 70.81                        | 70.24  | 30.61  | 51.59  | 66.97  | 83.16  | 26.22 | 31.12 | 71.93  | 72.91  | 31.48                 | 43     | 54.19  |
|      | R2*       | 145.45                       | 163.91 | 143.87 | 231.72 | 159.77 | 120.47 | 223   | 102   | 104.23 | 160.12 | 207.55                | 150.24 | 221.77 |
| 程思   | FF (%)    | 81.08                        | 89.24  | 80.53  | 91.66  | 86.5   | 95     | 85.29 | 71.65 | 87.58  | 94.83  | 72.65                 | 58.5   | 43.17  |
|      | R2*       | 144.16                       | 147.32 | 164.12 | 147.39 | 140.68 | 146.25 | 140.1 | 152.4 | 160.03 | 132.58 | 167.9                 | 178.27 | 243.57 |
| 蔡钦童  | FF (%)    | 62.39                        | 59.61  | 57.33  | 64.79  | 57.17  | 68.33  | 43.3  | 67.32 | 66.53  | 56.27  | 77.87                 | 57.59  | 66.74  |
|      | R2*       | 174.21                       | 198.15 | 165.27 | 157.24 | 207.7  | 97.33  | 247.4 | 98.71 | 193.62 | 289.37 | 204.37                | 250.47 | 158.32 |
| 罗可美  | FF (%)    | 54.44                        | 72.38  | 42.71  | 55.22  | 71.33  | 72.79  | 41.88 | 52.96 | 45.83  | 40.43  | 48                    | 41.81  | 44.7   |
|      | R2*       | 155.52                       | 129.12 | 190.67 | 178.56 | 157.44 | 122.29 | 220.7 | 174.3 | 197.5  | 188.47 | 194.87                | 183.96 | 156.63 |
| 洪美凤  | FF (%)    | 48.44                        | 53.52  | 34.97  | 59.17  | 46.83  | 45.59  | 42.83 | 44.44 | 44.93  | 42.42  | 32.17                 | 46.44  | 33.48  |
|      | R2*       | 167.41                       | 135.67 | 136    | 130.88 | 137.96 | 132.96 | 196.9 | 179.6 | 171.63 | 183.54 | 221.75                | 185.19 | 195.78 |
| 肖亮   | FF (%)    | 51.08                        | 61.81  | 72.26  | 80.96  | 80.23  | 73.5   | 69.77 | 92.15 | 87.7   | 92.12  | 67.92                 | 95     | 37.77  |
|      | R2*       | 175.96                       | 148.35 | 118.43 | 101.48 | 92.15  | 127.53 | 221.3 | 89.69 | 126.26 | 72     | 290.8                 | 93.65  | 177.54 |
| 叶和兴  | FF (%)    | 71.24                        | 91.66  | 79.59  | 80.88  | 89.06  | 70.38  | 60.04 | 75.98 | 86.81  | 68.15  | 86.09                 | 74.48  | 66.29  |
|      | R2*       | 103.86                       | 97.84  | 111.78 | 60.14  | 95.68  | 112.46 | 113   | 88.61 | 128.4  | 189.08 | 131.19                | 151.5  | 117.8  |
| 何联   | FF (%)    | 57.2                         | 56.09  | 53.74  | 62.2   | 74.06  | 63.06  | 67.54 | 81.34 | 61.6   | 58.94  | 82.06                 | 65.34  | 44.03  |
|      | R2*       | 211.34                       | 174.34 | 107.06 | 100.54 | 104.74 | 219.2  | 204   | 94.89 | 178.4  | 177.4  | 153.8                 | 139.46 | 225    |
| 凌春强  | FF (%)    | 58.93                        | 77     | 63.58  | 57.17  | 75     | 71.26  | 58.12 | 75.37 | 76.52  | 75.74  | 67.57                 | 74.57  | 60.08  |
|      | R2*       | 200.93                       | 135.88 | 160.31 | 220.78 | 150.08 | 174    | 188.4 | 137.1 | 136.56 | 130.52 | 203                   | 142.7  | 151.72 |
| 曾雪涓  | FF (%)    | 159.33                       | 62.97  | 61.5   | 61.04  | 56.393 | 68.43  | 55    | 56    | 58.59  | 64.88  | 54.83                 | 68.77  | 54.13  |
|      | R2*       | 148.67                       | 120.33 | 160.77 | 95.67  | 139.5  | 136    | 174   | 121   | 143    | 129.58 | 155.07                | 107.93 | 126.6  |
| 余琼花  | FF (%)    | 48.96                        | 72.3   | 59.85  | 66.19  | 50.59  | 61.44  | 53.43 | 61.35 | 53.5   | 54.85  | 48.83                 | 38.85  | 60.56  |
|      | R2*       | 177.74                       | 186.81 | 153.7  | 111.65 | 146.15 | 152.88 | 182.4 | 143.9 | 153.88 | 145.19 | 206.74                | 134.85 | 138.33 |
| 罗惠   | FF (%)    | 76.47                        | 87.33  | 63.83  | 73.74  | 74.67  | 74.42  | 88.7  | 92.7  | 92.04  | 54.07  | 72.52                 | 54.22  | 61.7   |
|      | R2*       | 120.2                        | 127.9  | 133.07 | 122.2  | 142.5  | 111.9  | 111   | 132   | 124.37 | 114.27 | 122.33                | 106.56 | 124.78 |
| 林鹏彬  | FF (%)    | 62.47                        | 74.72  | 87.32  | 77.58  | 70.09  | 67.83  | 72.7  | 60.3  | 68.47  | 55.89  | 87.72                 | 54.09  | 54     |
|      | R2*       | 115.71                       | 89.38  | 115.71 | 111.8  | 121.82 | 94.5   | 149   | 109   | 118.75 | 154.14 | 124.72                | 135.97 | 101.68 |
| 刘杰   | FF (%)    | 26.97                        | 40.6   | 51.13  | 51.12  | 22.84  | 5.2    | 47.2  | 56.9  | 33.03  | 6      | 69.48                 | 45.44  | 39.33  |
|      | R2*       | 90.5                         | 110.9  | 110.73 | 119.3  | 94.27  | 54.57  | 189   | 126   | 137.27 | 103.79 | 135.09                | 110.71 | 125.8  |

|     |        |        |        |        |        |        |        |       |       |        |        |        |        |        |
|-----|--------|--------|--------|--------|--------|--------|--------|-------|-------|--------|--------|--------|--------|--------|
| 文志鹏 | FF (%) | 55.43  | 54.41  | 587.56 | 54.83  | 65.74  | 67.76  | 59.69 | 65.74 | 75.67  | 65.12  | 69.73  | 73.15  | 52.5   |
|     | R2*    | 115.71 | 200.9  | 127.7  | 184.62 | 107.67 | 126.1  | 188.8 | 155.1 | 151.78 | 172.08 | 159.92 | 188.81 | 175.19 |
| 李秋  | FF (%) | 37.46  | 49.58  | 20.15  | 52.74  | 30.07  | 50.59  | 36.58 | 40.31 | 36.74  | 47.24  | 45.07  | 49.96  | 38.52  |
|     | R2*    | 126.19 | 150.85 | 120    | 191.85 | 97.45  | 133.31 | 189.1 | 99.69 | 140.41 | 128.38 | 193.15 | 145.88 | 89.76  |
| 黄以满 | FF (%) | 86.33  | 65.12  | 61.52  | 61.72  | 92.96  | 87.78  | 52.62 | 68.52 | 92.46  | 72.2   | 67.52  | 67.38  | 57.46  |
|     | R2*    | 90.37  | 154.38 | 146.48 | 127.84 | 85.09  | 124.93 | 145.2 | 88.76 | 94.19  | 94.52  | 121.91 | 100    | 144.92 |
| 黄昌珍 | FF (%) | 52.96  | 56.16  | 29.23  | 56.96  | 56.5   | 40.89  | 36.88 | 42.08 | 54.2   | 32.58  | 35.65  | 48.04  | 28.12  |
|     | R2*    | 152.23 | 157.92 | 129.65 | 150    | 158.96 | 136.85 | 200.9 | 128.5 | 154    | 136.08 | 145.77 | 182.04 | 121.88 |
| 王冲  | FF (%) | 70.73  | 66.35  | 82     | 70.35  | 75.85  | 73     | 85.93 | 73.03 | 69.63  | 80.7   | 78.88  | 92.71  | 51.26  |
|     | R2*    | 118.83 | 131.56 | 126.56 | 100.68 | 129.91 | 104.26 | 106.7 | 93.82 | 136.07 | 97.23  | 109.21 | 72.5   | 184.35 |
| 冯小康 | FF (%) | 57.7   | 56.24  | 66.31  | 57.23  | 60.83  | 58.7   | 67.7  | 62.73 | 77.83  | 78.55  | 71.3   | 61.2   | 37.48  |
|     | R2*    | 52.53  | 53.05  | 43.32  | 195.1  | 150.93 | 140.59 | 146.6 | 128.7 | 140.59 | 161.45 | 185.8  | 229    | 258.67 |
| 孔德钦 | FF (%) | 57.63  | 66     | 52.34  | 64.69  | 58.81  | 60.86  | 57.34 | 60.86 | 60.37  | 60.23  | 59.26  | 59.87  | 48.55  |
|     | R2*    | 192.8  | 167.57 | 182.07 | 208.24 | 208.48 | 189.79 | 179.8 | 175.1 | 155.5  | 163.77 | 187.52 | 185.3  | 184.5  |
| 谢远仙 | FF (%) | 58.67  | 59.006 | 58.27  | 67.68  | 37.3   | 56.88  | 46.8  | 71.67 | 19     | 55.8   | 23.97  | 62.57  | 27.7   |
|     | R2*    | 162.36 | 222.47 | 144.42 | 111.56 | 135.27 | 160.33 | 292.4 | 182.8 | 273.48 | 218.23 | 321.39 | 195    | 150.43 |
| 肖晓文 | FF (%) | 58.59  | 75.85  | 52.52  | 70.17  | 77.5   | 63.63  | 64.81 | 69.38 | 63.5   | 68.48  | 64.08  | 144.58 | 65.88  |
|     | R2*    | 103.92 | 157.37 | 161.63 | 85.37  | 123.71 | 145.17 | 134   | 97.08 | 155.59 | 135.88 | 67     | 142.29 | 125.92 |
| 林晓山 | FF (%) | 41.65  | 40.48  | 39.84  | 51.31  | 64.5   | 49.57  | 35.64 | 52.91 | 38.83  | 45.93  | 32.84  | 44.52  | 39     |
|     | R2*    | 145.48 | 121.57 | 169.36 | 144.08 | 129.62 | 163.43 | 169.8 | 148.7 | 141.67 | 152.85 | 162.12 | 151.47 | 137.48 |

## FF&R2\* value in Late Active Group from October 2020 to November 2021

| name | parameter | Bone Marrow Edema |        |         |        |    | Fat Mateplasia |        |        |        |    |    |          |
|------|-----------|-------------------|--------|---------|--------|----|----------------|--------|--------|--------|----|----|----------|
|      |           | Edema1            | E2     | E3      | E4     | E5 | Average        | Fat1   | F2     | F3     | F4 | F5 | Average  |
| 吴国龙  | FF (%)    | 18.52             | 7.78   |         |        |    | 13.15          |        |        |        |    |    | 0        |
|      | R2*       | 130.12            | 81.17  |         |        |    | 105.645        |        |        |        |    |    |          |
| 申三玉  | FF (%)    | 27.76             | 38.27  | 31.12   | 43.59  |    | 35.185         | 93.66  | 94.66  | 95.47  |    |    | 94.59667 |
|      | R2*       | 101.78            | 119.5  | 102.03  | 130.79 |    | 113.525        | 130.88 | 123.34 | 107.22 |    |    | 120.48   |
| 程思   | FF (%)    | 47.16             | 38.9   |         |        |    | 43.03          | 93.91  | 90.86  | 94.64  |    |    | 93.13667 |
|      | R2*       | 183.68            | 176    |         |        |    | 179.84         | 126.15 | 135.92 | 118.95 |    |    | 127.0067 |
| 蔡钦童  | FF (%)    | 7.67              | 3.22   |         |        |    | 5.445          | 83.75  | 85.38  |        |    |    | 84.565   |
|      | R2*       | 184.44            | 147.89 |         |        |    | 166.165        | 109.25 | 111.69 |        |    |    | 110.47   |
| 罗可美  | FF (%)    |                   |        |         |        |    |                | 96.23  | 87.83  |        |    |    | 92.03    |
|      | R2*       |                   |        |         |        |    |                | 116.3  | 112.13 |        |    |    | 114.215  |
| 洪美凤  | FF (%)    | 15.25             | 40.67  | 22.39   |        |    | 26.10333       |        |        |        |    |    |          |
|      | R2*       | 223               | 128.62 | 156.72  |        |    | 169.4467       |        |        |        |    |    |          |
| 肖亮   | FF (%)    |                   |        |         |        |    |                | 80.69  | 81.16  | 73.5   |    |    | 78.45    |
|      | R2*       |                   |        |         |        |    |                | 96.76  | 81.48  | 127.23 |    |    | 101.8233 |
| 叶和兴  | FF (%)    | 14.29             | 28.63  | 39.71   |        |    | 27.54333       | 94.06  | 91.03  | 92.66  |    |    | 92.58333 |
|      | R2*       | 105.63            | 101.27 | 155.67  |        |    | 120.8567       | 79.06  | 108.86 | 91.54  |    |    | 93.15333 |
| 何联   | FF (%)    | 55.71             | 35.43  | 50.23   |        |    | 47.12333       | 82.59  | 86.94  | 88.28  |    |    | 85.93667 |
|      | R2*       | 121.37            | 105.37 | 107.23  |        |    | 111.3233       | 144    | 144.44 | 113.22 |    |    | 133.8867 |
| 凌春强  | FF (%)    |                   |        |         |        |    |                |        |        |        |    |    |          |
|      | R2*       |                   |        |         |        |    |                |        |        |        |    |    |          |
| 曾雪涓  | FF (%)    | 52.81             | 58.59  |         |        |    | 55.7           | 77.11  | 82     |        |    |    | 79.555   |
|      | R2*       | 129.12            | 143    |         |        |    | 136.06         | 136.78 | 183.69 |        |    |    | 160.235  |
| 余琼花  | FF (%)    | 27.52             | 26.44  | 29.83   |        |    | 27.93          |        |        |        |    |    |          |
|      | R2*       | 175.61            | 136.92 | 98.13   |        |    | 136.8867       |        |        |        |    |    |          |
| 罗惠   | FF (%)    | 53.17             | 38.86  | 46.015  |        |    | 46.015         | 89.17  | 94.5   |        |    |    | 91.835   |
|      | R2*       | 113.5             | 118.57 | 116.035 |        |    | 116.035        | 82.83  | 112.17 |        |    |    | 97.5     |
| 林鹏彬  | FF (%)    | 33.78             | 35.7   |         |        |    | 34.74          | 76.5   | 87.72  | 92.1   |    |    | 85.44    |
|      | R2*       | 86.91             | 90.26  |         |        |    | 88.585         | 109.23 | 124.72 | 108.9  |    |    | 114.2833 |
| 刘杰   | FF (%)    | 11.5              | 6      | 5.27    |        |    | 7.59           | 64.5   | 69.48  |        |    |    | 66.99    |
|      | R2*       | 52.79             | 103.79 | 65.87   |        |    | 74.15          | 143.23 | 135.09 |        |    |    | 139.16   |

|     |        |        |        |        |        |          |          |        |        |        |                   |
|-----|--------|--------|--------|--------|--------|----------|----------|--------|--------|--------|-------------------|
| 文志鹏 | FF (%) | 63.38  | 69.19  |        |        |          | 66.285   | 84.07  | 66.27  |        | 75.17             |
|     | R2*    | 168.88 | 134.58 |        |        |          | 151.73   | 169.52 | 232.35 |        | 200.935           |
| 李秋  | FF (%) | 34.41  | 19.5   | 26.76  |        |          | 26.89    | 62.92  | 65.06  |        | 63.99             |
|     | R2*    | 93.93  | 123    | 109.52 |        |          | 108.8167 | 159.15 | 162.5  |        | 160.825           |
| 黄以满 | FF (%) | 18.81  | 28.22  | 28     |        |          | 25.01    | 87.96  | 93.04  | 93.19  | 91.39667          |
|     | R2*    | 111.48 | 95.48  | 92.65  |        |          | 99.87    | 106.7  | 121.56 | 157.81 | 128.69            |
| 黄昌珍 | FF (%) | 21     | 154.69 | 5.93   | 26     | 60.54    | 53.632   | 82.62  | 82.62  |        | 69.853 78.36433   |
|     | R2*    | 132.94 | 119.5  | 166.79 | 153.72 | 139.7433 | 142.5387 | 120.62 | 222.62 |        | 156.3805 166.5402 |
| 王冲  | FF (%) |        |        |        |        |          |          | 96.33  | 95.64  | 92.91  | 94.96             |
|     | R2*    |        |        |        |        |          |          | 103.77 | 100    | 146.21 | 116.66            |
| 冯小康 | FF (%) |        |        |        |        |          |          | 82     | 85.63  |        | 83.815            |
|     | R2*    |        |        |        |        |          |          | 131.15 | 128.5  |        | 129.825           |
| 孔德钦 | FF (%) |        |        |        |        |          |          | 87.4   |        |        | 87.4              |
|     | R2*    |        |        |        |        |          |          | 150.1  |        |        | 150.1             |
| 谢远仙 | FF (%) | 30.88  | 32.4   | 29.47  |        |          | 30.91667 | 69.5   | 77.3   | 71.85  | 72.88333          |
|     | R2*    | 200.09 | 139.93 | 270.9  |        |          | 203.64   | 181.63 | 180.87 | 223.61 | 195.37            |
| 肖晓文 | FF (%) |        |        |        |        |          |          | 88     | 90.07  |        | 89.035            |
|     | R2*    |        |        |        |        |          |          | 104.38 | 121.37 |        | 112.875           |
| 林晓山 | FF (%) | 18.19  | 12.26  |        |        |          | 15.225   |        |        |        |                   |
|     | R2*    | 160.88 | 159.74 |        |        |          | 160.31   |        |        |        |                   |
