# Supplementary material for: Chemical Shift-Encoded MRI of Bone Metabolic Markers in Ankylosing Spondylitis
Source: Dis Markers. 2022 Oct 13;2022:1846667. doi: 10.1155/2022/1846667 (PMC9584712; doi:10.1155/2022/1846667)
Supplement: Supplementary Materials — Table S1: overview of FF, R2∗ values and clinical data of 4 groups. Table S2–S5: FF and R2∗ value of each ROI in different 4 groups. [file 1846667.f1.zip › Table S4.pdf]

## FF&R2\* value in Inactive Group from October 2020 to November 2021

| name | parameter | Different Regions Of SIJ_ROI |        |         |        |        |       |        |        |        |        |        | S2 Vertebral Body |        |
|------|-----------|------------------------------|--------|---------|--------|--------|-------|--------|--------|--------|--------|--------|-------------------|--------|
|      |           | 1                            | 2      | 3       | 4      | 5      | 6     | 7      | 8      | 9      | 10     | 11     | 12                | 13     |
| 冯威润  | FF (%)    | 52.79                        | 47.84  | 42.48   | 51.56  | 67.38  | 53.67 | 58.5   | 57.12  | 50.24  | 47.88  | 59.92  | 50.48             | 53     |
|      | R2*       | 216.46                       | 335.92 | 293.92  | 265.96 | 107    | 269   | 244.42 | 209.68 | 269.83 | 223.96 | 182.5  | 241.84            | 190.33 |
| 周依柔  | FF (%)    | 55.67                        | 49.08  | 52.21   | 52.29  | 55.83  | 47.17 | 65.16  | 52.38  | 75.57  | 46.96  | 73.28  | 38.71             | 3.6    |
|      | R2*       | 177.86                       | 144.21 | 98.83   | 118.92 | 152.92 | 143.2 | 127.44 | 134.71 | 155.76 | 120.5  | 177.56 | 136.79            | 67.72  |
| 方烨炜  | FF (%)    | 90.29                        | 59.5   | 62.92   | 67     | 75.17  | 70.29 | 76.48  | 56.62  | 85.12  | 64.32  | 67.12  | 72.96             | 57.64  |
|      | R2*       | 101.04                       | 140.5  | 141.6   | 159.48 | 90.33  | 114.5 | 154.96 | 132.52 | 109.2  | 156.96 | 139.04 | 120.19            | 141.32 |
| 胡思达  | FF (%)    | 52.72                        | 79.27  | 63.33   | 73.83  | 59.64  | 61.62 | 82.91  | 60.2   | 61.46  | 56.75  | 70.76  | 58.8              | 29.46  |
|      | R2*       | 170.08                       | 118.59 | 156.354 | 118.3  | 158.22 | 174.9 | 156.17 | 135.04 | 139.62 | 173    | 169.6  | 161.12            | 182.79 |
| 万丽红  | FF (%)    | 63.11                        | 60.79  | 56.17   | 58.44  | 59.28  | 56.82 | 51.82  | 69.24  | 53.68  | 56.68  | 54.24  | 50.74             | 51.84  |
|      | R2*       | 186.06                       | 172.42 | 124.33  | 162.94 | 169.72 | 143.1 | 187.35 | 167.88 | 181.58 | 150.42 | 174.05 | 201               | 170.74 |
| 罗发成  | FF (%)    | 58.38                        | 63.67  | 64.08   | 58.52  | 68.04  | 65.52 | 65.36  | 71.12  | 65.2   | 54.16  | 70.92  | 58.5              | 46.24  |
|      | R2*       | 156.62                       | 142.5  | 115.16  | 179.84 | 106.36 | 138.1 | 149.76 | 121.04 | 158.96 | 214.96 | 155.08 | 221.08            | 210.2  |
| 康少明  | FF (%)    | 54.06                        | 54.69  | 53.83   | 59.05  | 59.89  | 56.42 | 62.84  | 57.97  | 61.16  | 55.05  | 57.8   | 63.42             | 47.82  |
|      | R2*       | 148.67                       | 155.36 | 186.5   | 131.77 | 137.42 | 124.6 | 141.7  | 130    | 132.32 | 177.5  | 142.55 | 114.87            | 196.92 |
| 何细华  | FF (%)    | 57.7                         | 58.97  | 57.38   | 50.64  | 66.85  | 50.71 | 68.66  | 60.4   | 61.9   | 55.93  | 53.92  | 57.8              | 50.78  |
|      | R2*       | 154.96                       | 176.73 | 180.62  | 74.43  | 181.17 | 144.7 | 180.71 | 153.27 | 184.39 | 173.71 | 183.57 | 147.46            | 169.73 |
| 李明裕  | FF (%)    | 44                           | 52.03  | 53.25   | 50.74  | 58.2   | 61.47 | 159.52 | 61.94  | 42.06  | 44.74  | 43.06  | 43.35             | 46.44  |
|      | R2*       | 210.75                       | 195.18 | 162.47  | 173.5  | 154.1  | 131.6 | 154.06 | 139.52 | 239.44 | 196.26 | 216.06 | 190.77            | 186.71 |
| 顾娟娟  | FF (%)    | 81.08                        | 51.21  | 89.2    | 67.72  | 76.72  | 68.81 | 87.06  | 80.53  | 76.05  | 67.19  | 81.19  | 74.42             | 50.34  |
|      | R2*       | 127.37                       | 113.71 | 107.5   | 127    | 123.69 | 111.2 | 115.64 | 107.74 | 158.03 | 158.53 | 148.81 | 112.39            | 140.03 |
| 何向兰  | FF (%)    | 44                           | 66.74  | 51.17   | 62.89  | 67.25  | 57.76 | 52.18  | 61.34  | 62.15  | 49.68  | 47.06  | 56.84             | 69.59  |
|      | R2*       | 122.71                       | 142.38 | 169     | 148.06 | 142.28 | 157.4 | 150.68 | 123.97 | 134.76 | 123.29 | 181.12 | 171.16            | 142.41 |
| 胡南祥  | FF (%)    | 62.43                        | 97.87  | 60.6    | 93.88  | 66.19  | 90.53 | 73.71  | 86.96  | 61.9   | 76.12  | 67.81  | 68.56             | 61.96  |
|      | R2*       | 121.1                        | 107.57 | 148.1   | 85.42  | 138.56 | 107   | 168.52 | 102.59 | 160.47 | 123.21 | 138.67 | 135.89            | 122.58 |
| 舒玲   | FF (%)    | 45.77                        | 54.89  | 53.8    | 53.2   | 55.37  | 48.17 | 66.8   | 79.63  | 60.49  | 47.97  | 51.89  | 67.57             | 61.49  |
|      | R2*       | 124.94                       | 136.71 | 147.14  | 127.54 | 110.46 | 116.1 | 128.71 | 113    | 130.17 | 116.11 | 133.83 | 120.74            | 106.51 |
| 陈祖芬  | FF (%)    | 50                           | 46.71  | 46.94   | 55.89  | 45.17  | 45.51 | 45.57  | 52.31  | 49.37  | 44.49  | 45.69  | 150.26            | 56.29  |
|      | R2*       | 204.66                       | 188.11 | 174.34  | 160.14 | 118.31 | 126.1 | 170.74 | 184.94 | 156.34 | 165.77 | 179.23 | 157.29            | 130.49 |
| 史庆华  | FF (%)    | 53.26                        | 54.89  | 55.17   | 70.51  | 61.94  | 68.83 | 52.06  | 74.57  | 51.69  | 53.74  | 62.03  | 54.54             | 48.8   |
|      | R2*       | 157.43                       | 145.2  | 155.83  | 118.11 | 113.2  | 148   | 176.06 | 101.63 | 212.43 | 202.83 | 161.57 | 147.54            | 142.17 |
| 曾雪云  | FF (%)    | 62.46                        | 56.35  | 57.45   | 43.84  | 79.78  | 58.96 | 63.77  | 70.51  | 85.22  | 47.06  | 45.31  | 50.82             | 36.56  |
|      | R2*       | 130.31                       | 94.04  | 117.98  | 92.37  | 122.18 | 105.9 | 116.4  | 109.76 | 97.51  | 95.57  | 154.04 | 95.35             | 114.18 |
| 陈怡锋  | FF (%)    | 49.27                        | 48.8   | 47.95   | 44.52  | 18.9   | 59.4  | 59.75  | 58.6   | 19.55  | 43.6   | 50.73  | 43.6              | 44.94  |
|      | R2*       | 157.69                       | 180.85 | 184.8   | 222.09 | 141.23 | 141.3 | 175.35 | 143.1  | 155.86 | 164.04 | 202.96 | 202.67            | 185.94 |

|      |        |        |        |        |        |        |       |        |        |        |        |        |        |        |
|------|--------|--------|--------|--------|--------|--------|-------|--------|--------|--------|--------|--------|--------|--------|
| 李柔霞  | FF (%) | 54.87  | 80.9   | 51.09  | 54.23  | 57.02  | 49.04 | 40.32  | 55.84  | 65.11  | 61.94  | 66.67  | 54.62  | 82.05  |
|      | R2*    | 95.02  | 103.02 | 141.76 | 87.84  | 68.62  | 113.9 | 121.7  | 77.5   | 110.37 | 100.42 | 98.12  | 110.04 | 93.22  |
| 王思涵  | FF (%) | 62.93  | 64.74  | 77.89  | 60.16  | 70.59  | 19.74 | 70.52  | 56.58  | 66     | 45.77  | 71.74  | 58.22  | 52.08  |
|      | R2*    | 131.52 | 132.89 | 102.74 | 120.12 | 108.11 | 91.63 | 153.42 | 124.8  | 124.6  | 132.96 | 146.52 | 107.85 | 137.73 |
| 薛智萍  | FF (%) | 40.75  | 47.95  | 43.1   | 62.72  | 44.3   | 51.35 | 40.74  | 49.94  | 40.84  | 50.68  | 42.68  | 50.43  | 65.18  |
|      | R2*    | 141.86 | 139.95 | 169.1  | 100.1  | 161.6  | 139.2 | 166.93 | 160.91 | 151.57 | 141.39 | 178.49 | 152.27 | 113.3  |
| 蔡山山  | FF (%) | 42.32  | 54.36  | 45.87  | 54.22  | 51.76  | 57    | 53.81  | 60.03  | 47.95  | 57.54  | 56.44  | 51.7   | 35.13  |
|      | R2*    | 172.3  | 192.77 | 177.28 | 168.68 | 156.03 | 185   | 198.4  | 153    | 160.7  | 161.26 | 163.85 | 152.4  | 140.67 |
| 施丽茜子 | FF (%) | 55.55  | 49.04  | 54.65  | 60.54  | 84.26  | 73.7  | 54.39  | 66.35  | 70.07  | 50.15  | 52.69  | 55     | 46.92  |
|      | R2*    | 113.41 | 84.5   | 150.42 | 145.31 | 171.92 | 116.9 | 146.04 | 99.69  | 139.45 | 114.31 | 160.14 | 114.85 | 118.73 |
| 李丹   | FF (%) | 36.26  | 47.17  | 32.39  | 52.48  | 39.3   | 44.59 | 31.22  | 45.52  | 39.26  | 27.96  | 47.12  | 44.35  | 33.56  |
|      | R2*    | 118.37 | 109.7  | 143.87 | 112.36 | 122.48 | 136.7 | 125.35 | 92.19  | 131.91 | 135.64 | 149.46 | 120    | 117    |
| 常行君  | FF (%) | 59.24  | 40.6   | 41.04  | 63.5   | 48.67  | 40.56 | 31.69  | 53.7   | 41.88  | 42.3   | 27.52  | 46.93  | 43.6   |
|      | R2*    | 216.44 | 120.12 | 323.41 | 148.23 | 312.48 | 320.7 | 329.23 | 250.19 | 300.08 | 342.09 | 343.88 | 319.92 | 309.52 |
| 岳文琪  | FF (%) | 39.03  | 39.87  | 43.14  | 45.24  | 32.76  | 51.65 | 48.1   | 55.12  | 53     | 51.42  | 53.71  | 41.03  | 35.16  |
|      | R2*    | 180.27 | 147.03 | 155.55 | 120.3  | 143.3  | 184.1 | 174.97 | 135.58 | 166.84 | 58.87  | 145.23 | 161.59 | 140.74 |
| 王共海  | FF (%) | 72.06  | 78.03  | 74.63  | 81.93  | 67.69  | 79.27 | 71.88  | 73.41  | 89.27  | 67.91  | 68.03  | 72.83  | 57.8   |
|      | R2*    | 132.64 | 136.09 | 148.67 | 115.37 | 143.15 | 105.9 | 178.38 | 134.68 | 103.93 | 160.2  | 161.29 | 143.77 | 202.7  |

## FF&R2\* value in Inactive Group from October 2020 to November 2021

| name | parameter | Bone Marrow Edema |        |        |    |          | Fat Mateplasia |        |        |    |          |
|------|-----------|-------------------|--------|--------|----|----------|----------------|--------|--------|----|----------|
|      |           | Edema1            | E2     | E3     | E4 | Average  | Fat1           | F2     | F3     | F4 | Average  |
| 冯威润  | FF (%)    |                   |        |        |    |          |                |        |        |    |          |
|      | R2*       |                   |        |        |    |          |                |        |        |    |          |
| 周依柔  | FF (%)    |                   |        |        |    |          | 85.46          | 89.67  | 93.6   |    | 89.57667 |
|      | R2*       |                   |        |        |    |          | 159.7          | 171.33 | 121    |    | 150.6767 |
| 方烨炜  | FF (%)    |                   |        |        |    |          |                |        |        |    |          |
|      | R2*       |                   |        |        |    |          |                |        |        |    |          |
| 胡思达  | FF (%)    |                   |        |        |    |          | 84.61          | 94.21  | 90.79  |    | 89.87    |
|      | R2*       |                   |        |        |    |          | 91.65          | 107.83 | 112.96 |    | 104.1467 |
| 万丽红  | FF (%)    |                   |        |        |    |          | 63.77          | 64.25  |        |    | 64.01    |
|      | R2*       |                   |        |        |    |          | 147            | 177.58 |        |    | 162.29   |
| 罗发成  | FF (%)    |                   |        |        |    |          | 83.83          | 91.96  |        |    | 87.895   |
|      | R2*       |                   |        |        |    |          | 162            | 118.58 |        |    | 140.29   |
| 康少明  | FF (%)    |                   |        |        |    |          |                |        |        |    |          |
|      | R2*       |                   |        |        |    |          |                |        |        |    |          |
| 何细华  | FF (%)    |                   |        |        |    |          |                |        |        |    |          |
|      | R2*       |                   |        |        |    |          |                |        |        |    |          |
| 李明裕  | FF (%)    |                   |        |        |    |          |                |        |        |    |          |
|      | R2*       |                   |        |        |    |          |                |        |        |    |          |
| 顾娟娟  | FF (%)    |                   |        |        |    |          |                |        |        |    |          |
|      | R2*       |                   |        |        |    |          |                |        |        |    |          |
| 何向兰  | FF (%)    |                   |        |        |    |          | 84.9           | 85.57  |        |    | 85.235   |
|      | R2*       |                   |        |        |    |          | 117.7          | 109.6  |        |    | 113.65   |
| 胡南祥  | FF (%)    |                   |        |        |    |          | 96.58          | 97.87  | 89     |    | 94.48333 |
|      | R2*       |                   |        |        |    |          | 112.42         | 107.57 | 97.93  |    | 105.9733 |
| 舒玲   | FF (%)    |                   |        |        |    |          |                |        |        |    |          |
|      | R2*       |                   |        |        |    |          |                |        |        |    |          |
| 陈祖芬  | FF (%)    | 32.24             |        |        |    | 32.24    |                |        |        |    |          |
|      | R2*       | 132.89            |        |        |    | 132.89   |                |        |        |    |          |
| 史庆华  | FF (%)    |                   |        |        |    |          |                |        |        |    |          |
|      | R2*       |                   |        |        |    |          |                |        |        |    |          |
| 曾雪云  | FF (%)    | 56.36             | 47.73  |        |    | 52.045   | 84.19          | 80     |        |    | 82.095   |
|      | R2*       | 119.73            | 124.23 |        |    | 121.98   | 91.44          | 116    |        |    | 103.72   |
| 陈怡锋  | FF (%)    | 53.92             | 18.9   | 26.6   |    | 33.14    | 69.65          | 73.09  |        |    | 71.37    |
|      | R2*       | 141.27            | 141.23 | 129.29 |    | 137.2633 | 149.92         | 150.82 |        |    | 150.37   |

|      |        |        |        |        |  |          |        |        |       |          |
|------|--------|--------|--------|--------|--|----------|--------|--------|-------|----------|
| 李柔霞  | FF (%) |        |        |        |  |          | 76.71  | 69.87  |       | 73.29    |
|      | R2*    |        |        |        |  |          | 85.31  | 103    |       | 94.155   |
| 王思涵  | FF (%) | 46.44  | 63     | 77.85  |  | 62.43    | 77.89  | 74.04  |       | 75.965   |
|      | R2*    | 117.26 | 119.26 | 126.19 |  | 120.9033 | 102.74 | 128.8  |       | 115.77   |
| 薛智萍  | FF (%) | 40.38  | 24.96  |        |  | 32.67    | 81.52  | 79.72  | 76.08 | 79.10667 |
|      | R2*    | 177.25 | 99.91  |        |  | 138.58   | 115.46 | 130.4  | 90.87 | 112.2433 |
| 蔡山山  | FF (%) | 46.9   | 35     |        |  | 40.95    | 75.76  | 70.62  |       | 73.19    |
|      | R2*    | 170.19 | 130.21 |        |  | 150.2    | 139.38 | 181.52 |       | 160.45   |
| 施丽茜子 | FF (%) |        |        |        |  |          | 92.38  | 82.12  |       | 87.25    |
|      | R2*    |        |        |        |  |          | 121.38 | 141.62 |       | 131.5    |
| 李丹   | FF (%) |        |        |        |  |          |        |        |       |          |
|      | R2*    |        |        |        |  |          |        |        |       |          |
| 常行君  | FF (%) | 39.7   | 18.4   |        |  | 29.05    |        |        |       |          |
|      | R2*    | 262.83 | 193.78 |        |  | 228.305  |        |        |       |          |
| 岳文琪  | FF (%) | 28.5   | 43.89  |        |  | 36.195   |        |        |       |          |
|      | R2*    | 107.56 | 171.61 |        |  | 139.585  |        |        |       |          |
| 王共海  | FF (%) |        |        |        |  |          | 88.24  | 91     |       | 89.62    |
|      | R2*    |        |        |        |  |          | 169.05 | 97.31  |       | 133.18   |
