# Supplementary material for: Chemical Shift-Encoded MRI of Bone Metabolic Markers in Ankylosing Spondylitis
Source: Dis Markers. 2022 Oct 13;2022:1846667. doi: 10.1155/2022/1846667 (PMC9584712; doi:10.1155/2022/1846667)
Supplement: Supplementary Materials — Table S1: overview of FF, R2∗ values and clinical data of 4 groups. Table S2–S5: FF and R2∗ value of each ROI in different 4 groups. [file 1846667.f1.zip › Table S5.pdf]

Normal control Group from October 2020 to August 2022

| name      | param  | Different Regions Of SIJ_ROI |        |        |       |        |        |        |       |        |        |        | S2 Vertebral Body_ROI |        |
|-----------|--------|------------------------------|--------|--------|-------|--------|--------|--------|-------|--------|--------|--------|-----------------------|--------|
|           |        | 1                            | 2      | 3      | 4     | 5      | 6      | 7      | 8     | 9      | 10     | 11     | 12                    | 13     |
| 李文娟       | FF (%) | 45.63                        | 58.18  | 77.22  | 61    | 57.38  | 54.85  | 61.95  | 60.63 | 49.4   | 41.86  | 48.45  | 52.75                 | 51.9   |
|           | R2*    | 133.74                       | 91.73  | 127.29 | 86.25 | 133.57 | 104.56 | 127.17 | 89.15 | 141.05 | 129.11 | 132.57 | 96.97                 | 99.22  |
| 陈少辉       | FF (%) | 51.64                        | 82.36  | 70.64  | 88.95 | 69.85  | 67.05  | 57.58  | 71    | 60.2   | 61.9   | 55.67  | 55.48                 | 53.48  |
|           | R2*    | 130.57                       | 98.36  | 105.26 | 95.83 | 159.17 | 156.41 | 158.73 | 105.1 | 114.56 | 153.93 | 137.77 | 134.27                | 129.45 |
| 张德意       | FF (%) | 34.05                        | 54.05  | 68.4   | 75.2  | 56.61  | 60.29  | 67.75  | 63.59 | 46.7   | 65.3   | 49.4   | 65.02                 | 58.05  |
|           | R2*    | 228.1                        | 179.59 | 163.57 | 174   | 205.63 | 181.43 | 171.14 | 175.1 | 246.89 | 167.57 | 252.74 | 162.93                | 217.67 |
| 陶珊        | FF (%) | 64.88                        | 74.03  | 72.81  | 72.12 | 61.96  | 67.56  | 53.23  | 72.13 | 77.74  | 65.15  | 67.46  | 64.64                 | 83.48  |
|           | R2*    | 134.36                       | 108.78 | 41.77  | 150.3 | 214.19 | 158.85 | 189.46 | 143.2 | 113.07 | 202.77 | 211.77 | 232.44                | 115.96 |
| 公建伟       | FF (%) | 38.96                        | 42.7   | 42.35  | 51.75 | 45.91  | 53.02  | 40.83  | 41.95 | 36.16  | 43.46  | 30.92  | 50.59                 | 25.12  |
|           | R2*    | 133.07                       | 163.78 | 159.88 | 142.9 | 150.46 | 134.74 | 173.44 | 153.8 | 174.16 | 156.89 | 162.77 | 157.98                | 155.18 |
| Test03    | FF (%) | 54.59                        | 68.63  | 62.97  | 67.53 | 56.66  | 65.45  | 65.1   | 72.41 | 52.03  | 74.44  | 54.13  | 75.83                 | 51.79  |
|           | R2*    | 154.34                       | 122.1  | 141.07 | 86.93 | 152.1  | 145.59 | 185.8  | 131.7 | 200.67 | 156.15 | 178.97 | 117.37                | 125.45 |
| test04    | FF (%) | 40.23                        | 50.28  | 44.54  | 52.35 | 49     | 40.95  | 46.16  | 54.52 | 43.39  | 41.6   | 44.04  | 49.08                 | 46.48  |
|           | R2*    | 113.2                        | 130.07 | 158.88 | 151.2 | 134.71 | 146.68 | 152    | 145.7 | 115.35 | 136.44 | 143.04 | 126.68                | 125.12 |
| test05 (N | FF (%) | 39.95                        | 45.65  | 38.84  | 41.64 | 49.26  | 47.64  | 72.22  | 53.04 | 49.84  | 35.84  | 46.22  | 45.27                 | 28.33  |
|           | R2*    | 214.91                       | 243.78 | 210.88 | 220.3 | 202.83 | 190.2  | 152.09 | 167.2 | 189    | 224.44 | 213.17 | 234.12                | 122.88 |
| test06    | FF (%) | 45.58                        | 49.08  | 46.46  | 56.38 | 49.35  | 32.54  | 82.72  | 45.67 | 78.44  | 52.52  | 62.16  | 49.09                 | 53.77  |
|           | R2*    | 145.96                       | 138.84 | 163.96 | 99.42 | 155    | 146.92 | 114.76 | 132.8 | 123.4  | 126.04 | 148.8  | 103.78                | 133.77 |
| test07    | FF (%) | 69.58                        | 44.05  | 39.95  | 69.24 | 52.56  | 62.17  | 38.88  | 65.61 | 63.09  | 46.55  | 40.28  | 56.74                 | 39.85  |
|           | R2*    | 120.5                        | 155.32 | 165.18 | 138.4 | 131.24 | 169.78 | 162.54 | 122   | 176.39 | 142.68 | 142.64 | 140.09                | 103.62 |
| test08    | FF (%) | 72.72                        | 60.91  | 61.64  | 66.41 | 66.48  | 65     | 56.73  | 68    | 79.22  | 58.5   | 68.27  | 54.45                 | 54.92  |
|           | R2*    | 80.32                        | 136.68 | 117.32 | 114.1 | 108.52 | 108.77 | 149.23 | 103.5 | 71.39  | 146.28 | 122.64 | 178.91                | 140.68 |
| test09    | FF (%) | 82.23                        | 73.16  | 73.16  | 78.88 | 70.29  | 71.73  | 66.08  | 72.58 | 70.8   | 71.91  | 63.42  | 70                    | 64.61  |
|           | R2*    | 111.96                       | 149.82 | 116.68 | 120   | 130.62 | 148.14 | 120.75 | 92.54 | 145.2  | 152.68 | 163.71 | 128.13                | 162.75 |
| test14    | FF (%) | 59.397                       | 26     | 43.94  | 55.47 | 61.47  | 54.21  | 69.31  | 68.97 | 53.94  | 55.44  | 52.41  | 69.47                 | 52.59  |
|           | R2*    | 139.53                       | 144.06 | 167.94 | 123.5 | 156.91 | 125.67 | 133.14 | 124.4 | 138.11 | 116.35 | 154.59 | 149.03                | 148.25 |
| test15    | FF (%) | 59.88                        | 64.14  | 65.62  | 62.94 | 69.91  | 59.59  | 67.34  | 64.28 | 62.44  | 63.38  | 60.53  | 68.41                 | 65.44  |
|           | R2*    | 158.94                       | 136.94 | 152.24 | 142.1 | 155.31 | 173.06 | 144.09 | 138.8 | 150.44 | 147.32 | 161.75 | 119.84                | 187.76 |
| test16    | FF (%) | 53.71                        | 61.16  | 47.59  | 64.08 | 73.11  | 54.44  | 67.09  | 65.59 | 66.97  | 55.81  | 48.16  | 50.19                 | 43.03  |
|           | R2*    | 146.85                       | 117.25 | 148.5  | 83.25 | 103.83 | 125.92 | 130.32 | 125.1 | 142.75 | 131.06 | 175.56 | 141.09                | 133    |
| test15    | FF (%) | 52                           | 51.56  | 48.11  | 56.19 | 54.84  | 63.12  | 38.56  | 64.65 | 62.06  | 55.28  | 49.53  | 62.85                 | 48.47  |
|           | R2*    | 228.86                       | 188.74 | 214.14 | 170.2 | 154.16 | 161.24 | 223.15 | 111.6 | 161.06 | 168.61 | 224.5  | 163.38                | 217.25 |
| test16    | FF (%) | 46.26                        | 42.53  | 55.88  | 68.59 | 71     | 47.71  | 64.41  | 65.84 | 63.15  | 40.76  | 52.34  | 35.25                 | 44.5   |
|           | R2*    | 164.56                       | 93.18  | 148.16 | 113.2 | 103.19 | 131.79 | 129.24 | 108   | 135.64 | 131.38 | 155.12 | 138.25                | 134.29 |

|        |        |        |        |        |       |         |        |        |       |        |        |        |        |        |
|--------|--------|--------|--------|--------|-------|---------|--------|--------|-------|--------|--------|--------|--------|--------|
| test16 | FF (%) | 64.78  | 64.18  | 63.97  | 65.16 | 79.53   | 69.19  | 76.53  | 72.72 | 74.44  | 58.88  | 63.88  | 58.38  | 43.94  |
|        | R2*    | 108.39 | 160.47 | 150.97 | 157.2 | 92.26   | 101.78 | 112.58 | 107.3 | 95.19  | 156.59 | 132.28 | 135.47 | 153.7  |
| test17 | FF (%) | 64.62  | 82.88  | 56.65  | 72.81 | 55.31   | 84.78  | 56.62  | 75.09 | 66.86  | 63.47  | 80.71  | 67.5   | 43.35  |
|        | R2*    | 135.47 | 110.78 | 157.85 | 124.5 | 146.375 | 115.66 | 172.06 | 114.7 | 131.56 | 155.62 | 155.65 | 122.85 | 147.71 |
| test17 | FF (%) | 60     | 53.84  | 61.33  | 45.44 | 59.44   | 51.01  | 49.88  | 64.59 | 45.96  | 40.75  | 60.62  | 51.8   | 63.33  |
|        | R2*    | 72.19  | 116.56 | 113.04 | 191.1 | 131.84  | 177.93 | 142.88 | 97    | 134.56 | 158.88 | 47.46  | 85.44  | 181.83 |
| Test18 | FF (%) | 53.68  | 54.352 | 55     | 53.24 | 63.25   | 74.78  | 80.92  | 67    | 69.68  | 62.62  | 58.48  | 56.92  | 46     |
|        | R2*    | 57.85  | 157.48 | 122.22 | 74.8  | 121.5   | 146.26 | 119.28 | 98.85 | 95.4   | 121.92 | 146.24 | 98.42  | 93.65  |
| test18 | FF (%) | 68.75  | 70.22  | 77.59  | 63.29 | 78.38   | 74.22  | 69.24  | 69.81 | 74.06  | 63.28  | 60.06  | 62     | 44.72  |
|        | R2*    | 137.94 | 116.31 | 107.62 | 126   | 108.12  | 117.84 | 118.5  | 128.5 | 127.94 | 144.53 | 168.33 | 141.58 | 137.81 |
| test19 | FF (%) | 35.92  | 39.88  | 35.88  | 65.25 | 43.85   | 45.41  | 40.84  | 47.94 | 39.47  | 37.64  | 38.72  | 47.21  | 30.25  |
|        | R2*    | 182.89 | 171.85 | 157.21 | 93.38 | 136.53  | 183.69 | 183.22 | 150.9 | 172    | 179.89 | 172.81 | 174.53 | 188.16 |
| test20 | FF (%) | 40.33  | 55.62  | 36.62  | 55.56 | 45.71   | 45.36  | 46.14  | 52    | 39.75  | 44.38  | 37.09  | 44.88  | 52.85  |
|        | R2*    | 131.39 | 112.75 | 138.71 | 120   | 133.12  | 142.31 | 157.72 | 130.9 | 135.91 | 138.38 | 180.53 | 139.71 | 136.18 |
| 卫杨雄    | FF (%) | 42.02  | 52.15  | 44.22  | 67.18 | 50.41   | 45.62  | 45.00  | 68.43 | 38.67  | 45.64  | 38.86  | 42.45  | 49.67  |
| 卫杨雄    | R2*    | 219.31 | 223.17 | 247.76 | 191.8 | 226.61  | 224.96 | 228.94 | 144.4 | 291.52 | 241.49 | 243.78 | 273.69 | 180.42 |
| 徐国生    | FF (%) | 61.49  | 74.23  | 73.85  | 77.81 | 64.76   | 72.27  | 62.9   | 66.98 | 61.98  | 75.55  | 56.14  | 73.26  | 66.17  |
| 徐国生    | R2*    | 156.57 | 145.1  | 150.45 | 120.7 | 161.35  | 189.64 | 176.87 | 161.8 | 176    | 121.89 | 180.11 | 141.33 | 162.42 |
| 宋房珠    | FF (%) | 66.43  | 59.18  | 59.15  | 63.50 | 58.32   | 68.81  | 41.16  | 65    | 52.11  | 47.57  | 64.09  | 53.64  | 44.51  |
| 宋房珠    | R2*    | 112.23 | 197.82 | 148.19 | 150.7 | 76.66   | 170.36 | 196.89 | 156.8 | 164.89 | 146.32 | 147.45 | 136.34 | 142.15 |
| 刘孟莹    | FF (%) | 64.5   | 72.64  | 56.76  | 77.2  | 76.00   | 80.16  | 67.34  | 77.96 | 66.43  | 68.77  | 65.16  | 70.8   | 64.14  |
| 刘孟莹    | R2*    | 167.34 | 154.11 | 201.43 | 83.77 | 125.02  | 85.2   | 124.47 | 79.55 | 144.7  | 117.18 | 128.3  | 92.84  | 161.55 |
| 刘湘艳    | FF (%) | 59.85  | 66.91  | 63.43  | 73.1  | 52.77   | 62.19  | 55.21  | 67.68 | 60.68  | 59.89  | 59.43  | 60.89  | 59.51  |
| 刘湘艳    | R2*    | 97.89  | 109.91 | 99.07  | 97.45 | 174.39  | 173.13 | 183.83 | 141.6 | 145.64 | 157.15 | 136.07 | 154.43 | 172.00 |
| 王瑞敏    | FF (%) | 55.8   | 71.43  | 54.57  | 54.67 | 57.02   | 68.02  | 61.14  | 72.30 | 31.89  | 50.55  | 34.05  | 61.93  | 51.64  |
| 王瑞敏    | R2*    | 126.64 | 123.62 | 147.85 | 85.71 | 128.09  | 123.59 | 122.55 | 59.17 | 124.77 | 140.07 | 128.68 | 106.70 | 129.59 |
| 魏新     | FF (%) | 59.82  | 79.20  | 72.62  | 84.51 | 63.30   | 76.61  | 55.888 | 80.21 | 64.64  | 73.16  | 69.60  | 80.32  | 58.64  |
| 魏新     | R2*    | 121.11 | 122.27 | 124.81 | 109.8 | 128.77  | 95.93  | 169.9  | 90.02 | 154.60 | 132.86 | 145.59 | 95.62  | 114.55 |
| 梁强     | FF (%) | 54.55  | 57.91  | 54.19  | 57.14 | 67.86   | 63.32  | 56.16  | 69.64 | 65.09  | 64.75  | 46.07  | 64.95  | 55.13  |
| 梁强     | R2*    | 166.33 | 145.34 | 164.53 | ####  | 118.36  | 140.20 | 163.39 | 106.5 | 136.23 | 145.36 | 175.20 | 117.95 | 161.45 |
| 姚望     | FF (%) | 47.19  | 56.39  | 49.20  | 59.50 | 61.45   | 58.14  | 56.29  | 59.77 | 47.43  | 56.82  | 44.23  | 50.24  | 47.88  |
| 姚望     | R2*    | 174.77 | 177.73 | 181.11 | 148.4 | 151.05  | 213.89 | 197.81 | 176.7 | 173.23 | 197.43 | 200.53 | 181.55 | 176.64 |
| 王姣     | FF (%) | 40.69  | 51.07  | 44.11  | 54.72 | 56.38   | 48.50  | 48.98  | 49.88 | 54.45  | 41.86  | 50.62  | 48.34  | 36.82  |
| 王姣     | R2*    | 138.38 | 98.39  | 136.91 | 140.8 | 137.66  | 99.18  | 81.30  | 82.45 | 120.57 | 118.00 | 132.90 | 75.55  | 92.95  |
| 冯书仑    | FF (%) | 74.57  | 78.82  | 73.33  | 76.07 | 73.55   | 68.83  | 72.14  | 71.90 | 76.51  | 72.98  | 73.83  | 74.59  | 73.27  |
| 冯书仑    | R2*    | 136.18 | 120.34 | 134.88 | 118.8 | 181.20  | 189.02 | 170.05 | 159.9 | 131.96 | 163.82 | 168.32 | 140.16 | 137.25 |
| 何兴鸿    | FF (%) | 79.00  | 65.29  | 70.70  | 66.59 | 59.34   | 66.12  | 56.95  | 74.38 | 69.74  | 67.14  | 74.45  | 60.36  | 66.52  |

|     |        |        |        |        |       |        |        |        |       |        |        |        |        |        |
|-----|--------|--------|--------|--------|-------|--------|--------|--------|-------|--------|--------|--------|--------|--------|
| 何兴鸿 | R2*    | 98.73  | 169.40 | 94.21  | 137.3 | 156.51 | 171.26 | 194.81 | ##### | 129.32 | 141.39 | 165.98 | 176.89 | 139.02 |
| 祝继锋 | FF (%) | 59.07  | 64.45  | 53.36  | 75.02 | 59.72  | 78.06  | 63.29  | 71.93 | 55.18  | 65.5   | 50.91  | 71.34  | 41.90  |
| 祝继锋 | R2*    | 132.89 | 192.15 | 154.66 | 124.2 | 138.45 | 100.47 | 162.10 | ##### | 182.45 | 133.84 | 183.61 | 149.02 | 196.64 |
| 曾闻君 | FF (%) | 40.45  | 49.30  | 33.59  | 55.64 | 37.20  | 57.14  | 47.61  | 80.83 | 29.61  | 41.02  | 30.98  | 34.71  | 37.81  |
| 曾闻君 | R2*    | 135.18 | 143.98 | 174.32 | ####  | 169.30 | 133.52 | 161.80 | 120.9 | 197.57 | 179.75 | 205.72 | 147.29 | 173.75 |
| 马丽萍 | FF (%) | 76.05  | 80.44  | 76.49  | 82.88 | 85.22  | 63.39  | 90.49  | 67.92 | 83.79  | 63.19  | 68.35  | 66.30  | 46.40  |
| 马丽萍 | R2*    | 107.14 | 114.58 | 125.35 | 87.68 | 109.32 | 133.30 | 103.29 | 101.8 | 105.70 | 111.27 | 122.20 | 117.70 | 98.56  |
| 肖平平 | FF (%) | 41.88  | 54.38  | 38.20  | 67.12 | 46.91  | 38.36  | 45.47  | 57.05 | 39.98  | 47.43  | 43.72  | 49.25  | 37.87  |
| 肖平平 | R2*    | 183.67 | 189.56 | 165.80 | 179.6 | 195.33 | 236.31 | 185.58 | 185.9 | 218.47 | 180.08 | 217.07 | 164.09 | 146.04 |
| 李温青 | FF (%) | 56.49  | 62.55  | 54.34  | 83.00 | 64.76  | 67.80  | 59.41  | 60.49 | 55.68  | 76.87  | 61.72  | 61.94  | 74.12  |
| 李温青 | R2*    | 151.71 | 175.85 | 159.94 | 112.7 | 161.30 | 145.48 | 166.96 | 126.3 | 164.12 | 154.60 | 159.94 | 123.43 | 139.35 |
| 林耀山 | FF (%) | 77.58  | 65.77  | 65.47  | 71.13 | 68.17  | 70.08  | 57.35  | 54.56 | 71.53  | 49.12  | 56.65  | 58.92  | 38.47  |
| 林耀山 | R2*    | 104.47 | 151.51 | 120.65 | 132.2 | 118.60 | 146.68 | 179.73 | 182.9 | 115.08 | 251.05 | 170.30 | 180.10 | 281.42 |
| 陈清秀 | FF (%) | 49.35  | 57.25  | 48.93  | 59.15 | 51     | 63.38  | 48.03  | 56.85 | 52.35  | 51.77  | 48.03  | 56.85  | 52.56  |
| 陈清秀 | R2*    | 153.35 | 176.57 | 177.18 | 172   | 170.32 | 159.04 | 173.38 | 150.8 | 170.32 | 159.04 | 173.38 | 150.78 | 168.71 |
| 唐伟  | FF (%) | 51.24  | 58.78  | 53.68  | 65.72 | 54.53  | 65.20  | 50.92  | 61.74 | 43.70  | 53.67  | 56.96  | 55.40  | 52.35  |
| 唐伟  | R2*    | 157.17 | 131.38 | 180.58 | 123.4 | 168.88 | 119.22 | 153.19 | 163.2 | 170.70 | 155.73 | 158.95 | 131.56 | 122.15 |
| 张德胜 | FF (%) | 54.68  | 44.68  | 49.62  | 61.90 | 57.10  | 63.43  | 52.65  | 59.06 | 60.73  | 67.78  | 46.28  | 52.97  | 53.02  |
| 张德胜 | R2*    | 166.08 | 201.82 | 214.87 | 138.3 | 178.33 | 154.13 | 214.68 | 143.6 | 174.07 | 132.80 | 235.93 | 165.03 | 242.16 |
| 马彪  | FF (%) | 74.22  | 70.46  | 72.37  | 73.52 | 71.20  | 66.88  | 66.05  | 70.93 | 69.32  | 60.48  | 66.92  | 76.65  | 57.45  |
| 马彪  | R2*    | 101.56 | 125.33 | 130.88 | 132   | 120.50 | 137.46 | 155.28 | 123.3 | 139.72 | 175.51 | 163.75 | 106.56 | 191.97 |
| 许欣欣 | FF (%) | 40.76  | 59.31  | 32.64  | 58.18 | 53.65  | 63.22  | 58.50  | 59.92 | 43.14  | 53.08  | 50.02  | 49.79  | 65.06  |
| 许欣欣 | R2*    | 105    | 144.85 | 162.98 | 133   | 115.38 | 118.52 | 160.29 | 124.1 | 119.84 | 123.48 | 138.68 | 124.96 | 152.40 |
| 雷婕  | FF (%) | 40.43  | 62.87  | 46.27  | 55.29 | 44.25  | 65.10  | 38.78  | 51.67 | 35.53  | 36.32  | 38.02  | 37.84  | 42.31  |
| 雷婕  | R2*    | 119.94 | 105.58 | 122.50 | 106.1 | 113.60 | 101.10 | 121.20 | 95.31 | 111.96 | 129.30 | 124.08 | 116.51 | 68.75  |
| 何宝华 | FF (%) | 41.99  | 50.86  | 23.87  | 49.83 | 48.32  | 45.08  | 47.18  | 48.76 | 46.83  | 39.85  | 36.50  | 39.13  | 37.40  |
| 何宝华 | R2*    | 156.1  | 138.41 | 150.33 | 154.6 | 154.64 | 146.46 | 161.36 | 156.5 | 145.54 | 147.88 | 157.73 | 165.98 | 143.72 |
| 吕宝艳 | FF (%) | 69.16  | 62.78  | 52.35  | 64.86 | 56.52  | 60.96  | 55.56  | 59.82 | 72.92  | 56.23  | 60.06  | 57.21  | 43.58  |
| 吕宝艳 | R2*    | 130.49 | 129.51 | 141.04 | 101.2 | 151.76 | 148.07 | 148.58 | 172   | 149.83 | 138.34 | 148.21 | 140.21 | 95.07  |
| 徐伟  | FF (%) | 73.85  | 74.82  | 79.59  | 79.06 | 66.87  | 76.48  | 59.03  | 76.03 | 77.29  | 69.72  | 50.42  | 73.32  | 63.41  |
| 徐伟  | R2*    | 108    | 171.55 | 118.31 | 135   | 152.72 | 145.00 | 185.39 | ##### | 132.65 | 189.90 | 213.68 | 146.68 | 162.24 |
| 林树俊 | FF (%) | 67.1   | 71.97  | 68.38  | 62.00 | 70.29  | 59.67  | 78.55  | 69.70 | 63.14  | 57.32  | 54.55  | 46.68  | 52.52  |
| 林树俊 | R2*    | 114.1  | 111.21 | 116.79 | 115.6 | 111.67 | 210.24 | 170.61 | 124.6 | 142.66 | 223.39 | 182.79 | 241.61 | 182.42 |
| 梁立庚 | FF (%) | 83.48  | 70.72  | 78.93  | 74.06 | 74.00  | 73.36  | 74.97  | 80.82 | 74.29  | 84.42  | 78.00  | 81.31  | 82.58  |
| 梁立庚 | R2*    | 117.42 | 139.86 | 157.24 | 124.4 | 187.79 | 147.45 | 156.85 | 161.6 | 164.71 | 115.06 | 136.83 | 123.45 | 89.36  |
| 陈庚  | FF (%) | 55.77  | 62.87  | 59.12  | 59.33 | 65.81  | 67.79  | 62.55  | 70.13 | 56.17  | 58.74  | 57.65  | 60.67  | 42.24  |
| 陈庚  | R2*    | 165.84 | 133.77 | 114.94 | 155.8 | 154.19 | 145.45 | 143.86 | 116.1 | 167.17 | 147.94 | 186.68 | 179.58 | 180.86 |
